# Supplementary material for: Noninvasive Urine-Based Tests to Diagnose or Detect Recurrence of Bladder Cancer
Source: MDPI journal article supplement (doi:10.3390/cancers13071650), 2021-04-01
Supplement: s1 [file s1]

**Table 1.** Performances of non-invasive tests.

| <b>Test</b>                           | <b>Specificity</b> | <b>Sensitivity</b> | <b>Cohort</b>                           | <b>Publication</b> |
|---------------------------------------|--------------------|--------------------|-----------------------------------------|--------------------|
| BTA-TRAK-BTA-STAT                     | 68-72%             | 57-83%             | from 40 to 163 patients (total of 1874) | [29-21, 23]        |
| Alere NMP22-NMP22 BladderChek         | 79%                | 68%-65%            | Total of 22 260 patients                | [28-30]            |
| Immunocyt-uCyt+                       | 62%-84,2%          | 38,5%-92,1%        | Total of 4 199 patients                 | [30,38-39]         |
| UBC Rapid test                        | 77,3%-81,8%        | 61,3%-64,5%        | From to 31 to 452 (total of 773)        | [46-49]            |
| Lewis X antigen                       | 85%                | 75%                | From 101 to 260 (total of 361)          | [52, 54]           |
| Survivin                              | 80%-90%            | 100%               | From 30 to 46 (total of 188)            | [64, 65]           |
| HA-Haase test                         | 82,50%             | 90,80%             | From 51 to 504 (total of 1613)          | [66, 73]           |
| BLCA-1                                | 87%                | 80%                | 71 patients                             | [76]               |
| BLCA-4                                | 97%                | 93%                | From 76 to 253 patients (total of 1372) | [78, 79]           |
| Accu-Dx FDP                           | 68%-86%            | 52%-83%            | From 56 to 97 patients (total of 153)   | [82, 83]           |
| Tumor-secreted extracellular vesicles | 87,60%             | 62,70%             | From 6 to 191 patients (total of 197)   | [85, 86]           |
| Urinary midkine protein               | 77,90%             | 69,70%             | 162 patients                            | [94]               |
| Urovysion                             | 80%-92%            | 74%-84%            | From 179 to 400 patients                | [98-101]           |
| Xpert bladder cancer monitor          | 91%                | 84%                | 140 patients                            | [49]               |
| CxBladder detect                      | 85%-90%            | 47%-100%           | From 152 to 485 patients                | [102-105]          |
| uCAPP-Seq                             |                    | 77%-100%           | 185 patients                            | [107]              |
| UroSEEK                               | 80%-93%            | 83%-95%            | From 537 to 583 patients                | [108-110]          |
| Assure Mdx                            | 86%                | 93%                | 200 patients                            | [111]              |
| AURKA                                 | 80%-97%            | 80%-87%            | From 248 to 487 patients                | [112-115]          |
| DNA methylation                       | 94%-100%           | 82%-94%            | From 36 to 440 patients                 | [116-122]          |
| Uromonitor                            | 93%                | 74%                | 185 patients                            | [123]              |
